# Supplementary material for: A study of salivary cortisol and glutamate after the cold pressor task in healthy adults
Source: PeerJ. 2025 Jul 23;13:e19625. doi: 10.7717/peerj.19625 (PMC12296562; doi:10.7717/peerj.19625)
Supplement: Supplemental Information 1 — The tables show all the collected/measured quantities for each human participant (age, gender, pain score, glutamate and cortisol levels) in an anonymised form. [file peerj-13-19625-s001.xlsx]

## Sheet: Experiment 
	Saliva Sample Volume		Ideally 1 ml - if cannot, just make sure that it is > 0.5ml
		Take saliva sample
		take just BP + HR
		pain induction - put forearm+hand in icebath
	Age	Gender	T -2 & T-1		T = 0		T = X		T = X + 5		T = X + 10		T = X + 15		T = X + 20		T = X + 25		T = X + 30		T = X + 35		T = X + 40		T = X + 45		T = X + 50		T = X + 55		T = X + 60		VAS	Water Temp (C)	X Value
			BP	HR	BP	HR	BP	HR	BP	HR	BP	HR	BP	HR	BP	HR	BP	HR	BP	HR	BP	HR	BP	HR	BP	HR	BP	HR	BP	HR	BP	HR
P1	34	F	96/73	70	119/91	78	110/80	70			100/84	75			87/64	60			101/79	68			103/83	77			98/78	69			95/76	70	7	5	5 min
P2	23	M	126/64	52	140/78	47	143/72	66			133/80	54			128/87	58			136/81	53			136/83	52			137/86	52			128/74	58	4	8	5 min
P3	40	F	113/80	58	141/91	70	108/68	48			112/76	57			108/78	51			109/74	54			105/77	55			107/78	53			109/79	59	8	0	5
P4	21	F	115/77	69	142/127	95	117/94	67	116/97	61	104/83	73	103/74	69	110/90	73	121/86	68	104/80	69	107/77	69	112/83	74	112/81	71	100/79	76	109/93	74	107/79	69	7.5	0	5 min
P5	40	M	132/85	66	150/98	69	126/92	72	122/81	67	113/80	68	121/74	56	123/81	62	114/87	62	124/84	61	121/84	66	125/90	70	112/81	64	118/77	68	117/79	69	112/73	61	5	0	5
P6	35	M	105/73	71	118/74	81	98/66	66	107/74	73	127/75	71	104/71	62	105/75	71	118/82	71	104/76	71	104/67	63	110/78	65	108/75	67	111/75	68	110/74	68	112/74	66	4.5	4	5 min
P7	22	M	127/86	77	144/96	80	129/77	78	121/79	74	123/79	83	127/74	70	124/82	76	130/84	77	121/77	75	126/77	78	121/79	78	120/72	71	121/76	75	124/76	69	119/80	77	3	0	5
P8	23	M	93/70	74	117/86	88	99/67	69	109/88	67	94/66	68	96/67	70	100/72	68	111/70	60	98/73	76	102/74	68	97/67	67	95/68	64	109/89	67	110/69	66	95/70	70	6	0	5
P9	26	F	100/77	68	136/100	66	100/75	61	109/79	62	109/78	64	106/80	61	103/77	57	102/78	60	125/106	58	112/76	61	102/79	60	103/72	62	101/79	59	106/90	73	122/73	54	6	0	5
P10	22	F	98/76	82	107/74	84	95/70	79	99/71	75	94/71	80	99/73	77	119/80	80	114/65	82	108/82	82	106/81	83	104/85	63	102/85	78	98/78	81	93/67	75	103/76	78	7.5	0	5 min
P11	21	M	121/75	91	91/64	57	57/27	43	80/60	73	100/68	82	79/57	82	93/55	82	97/70	94	114/70	85	98/63	83	97/68	88	94/66	88	90/63	72	100/68	79	95/72	86	8	0	4.30 min
P12	25	M	107/75	65	117/78	63	114/75	54	108/69	55	178/64	52	104/71	47	104/73	56	121/81	60	102/66	51	108/74	50	108/77	55	108/78	60	108/77	55	111/69	48	115/87	54	8	5	5 min
P13	22	M	123/85	66	130/95	69	102/77	67	108/76	75	119/88	72	115/89	72	120/90	67	124/81	72	124/91	69	119/96	64	131/94	69	132/94	72	128/104	67	127/94	62	126/92	69	7	0	5 min
P14	22	F	124/89	75	135/99	79	125/85	78	116/83	66	121/85	77	125/80	63	119/94	77	119/80	68	116/82	75	124/88	73	106/82	74	118/92	72	123/93	75	119/83	67	118/87	70	6	0	5
P15	27	F	121/77	61	138/89	73	118/99	66	122/82	64	105/69	64	108/86	71	114/70	65	113/76	64	110/74	66	98/62	62	111/75	69	111/80	65	106/70	59	100/72	63	109/74	64	6.5	0	5
P16	24	F	105/85	71	125/99	78	96/77	72	101/82	69	104/90	71	101/87	75	112/95	82	101/87	72	100/81	73	109/94	69	105/92	71	107/85	68	97/81	73	113/95	72	106/92	76	7.5	0	5
P17	36	M	111/78	69	123/85	76	112/78	70	110/75	72	111/84	70	123/90	65	116/83	71	106/82	72	114/87	73	120/87	65	112/80	68	108/74	78	118/87	73	109/85	67	111/81	66	8	0	0.93
P18	37	F	127/75	43	121/82	72			122/84	51	118/83	47	113/79	47	115/81	49	115/79	49	117/81	50	110/80	49	112/80	49	115/79	43	116/86	49	111/76	45	130/78	48	6	0	5 min
P19	23	M	126/84	72	154/95	74	136/84	69	130/81	67	135/90	74	134/93	74	126/82	76	122/85	69	129/89	76	117/83	72	128/85	80	136/84	71	140/90	83	125/85	76	126/87	76	3	0	5
P20	24	F	101/73	66	121/93	83	110/85	57	103/80	56	111/73	57	108/90	65	109/84	63	130/109	68	106/85	69	106/82	72	106/70	80	107/83	74	97/75	68	95/73	58	91/70	72	6	0	5 min
	MAX AGE	MIN AGE	MEAN AGE
	40	21	27.35

## Sheet: ELISA - Cortisol
FIRST RUN
WELL FORMAT
	1	2	3	4	5	6	7	8	9	10	11	12		SAMPLE number	Participant number
A	3.000 Std	3.000 Std	Ctrl - H	Ctrl - H	SAM 3 - PRE	SAM 3 - PRE	SAM 5 - POST	SAM 5 - POST	SAM 8 - X	SAM 8 - X				1	3
B	1.000 Std	1.000 Std	Ctrl - L	Ctrl - L	SAM 3 - X	SAM 3 - X	SAM 6 - PRE	SAM 6 - PRE	SAM 8 - POST	SAM 8 - POST				2	5
C	0.333 Std	0.333 Std	SAM 1 - PRE	SAM 1 - PRE	SAM 3 - POST	SAM 3 - POST	SAM 6 - X	SAM 6 - X	SAM 9 - PRE	SAM 9 - PRE				3	7
D	0.111 Std	0.111 Std	SAM 1 - X	SAM 1 - X	SAM 4 - PRE	SAM 4 - PRE	SAM 6 - POST	SAM 6- POST	SAM 9 - X	SAM 9 - X				4	8
E	0.037 Std	0.037 Std	SAM 1 - POST	SAM 1 - POST	SAM 4 - X	SAM 4 - X	SAM 7 - PRE	SAM 7 - PRE	SAM 9 - POST	SAM 9 - POST				5	9
F	0.012 Std	0.012 Std	SAM 2 - PRE	SAM 2 - PRE	SAM 4 - POST	SAM 4 - POST	SAM 7 - X	SAM 7 - X	SAM 10 - PRE	SAM 10 - PRE				6	14
G	Zero	Zero	SAM 2 - X	SAM 2 - X	SAM 5 - PRE	SAM 5 - PRE	SAM 7 - POST	SAM 7 - POST	SAM 10 - X	SAM 10 - X				7	15
H	NSB	NSB	SAM 2 - POST	SAM 2 - POST	SAM 5 - X	SAM 5 - X	SAM 8 - PRE	SAM 8 - PRE	SAM 10 - POST	SAM 10 - POST				8	16
														9	17
														10	19
READ @450nm
	1	2	3	4	5	6	7	8	9	10	11	12		READ @491nm
A	0.232	0.1513	0.4898	0.5005	1.2674	1.1039	1.9594	1.9242	1.532	1.4986					1	2	3	4	5	6	7	8	9	10	11	12
B	0.4876	0.4532	1.694	1.7141	1.2212	1.0465	1.226	1.1669	1.3851	1.3365				A	0.0707	0.0688	0.1197	0.1245	0.2628	0.2278	0.3814	0.3775	0.3111	0.2994
C	1.0521	1.0522	1.4355	1.4261	1.3727	1.3478	1.4689	1.3047	1.3962	1.3427				B	0.1122	0.1091	0.3228	0.3268	0.2449	0.2091	0.2415	0.2313	0.267	0.2705
D	1.7242	1.6727	1.2842	1.271	1.7343	1.5911	0.76	0.7244	1.247	1.1835				C	0.2071	0.2085	0.2787	0.2745	0.2693	0.265	0.2863	0.2564	0.2711	0.2657
E	2.2193	2.1557	0.8897	0.921	1.5905	1.471	1.5046	1.4102	1.372	1.2855				D	0.319	0.3122	0.2522	0.254	0.3436	0.3021	0.1663	0.1523	0.2434	0.2409
F	2.459	2.4107	1.4842	1.4929	1.2845	1.2521	0.984	0.9586	1.1584	1.0758				E	0.4107	0.398	0.1804	0.1923	0.3082	0.2805	0.2947	0.2703	0.2717	0.2599
G	2.5	2.4801	1.4542	1.3892	2.0097	1.8857	1.5091	1.4906	1.041	0.977				F	0.4632	0.4458	0.2869	0.2926	0.255	0.2463	0.2052	0.1957	0.2335	0.2304
H	0.0804	0.079	1.7261	1.6449	2.0287	1.8537	1.7207	1.6634	1.2079	1.1495				G	0.468	0.484	0.2827	0.2711	0.3755	0.3573	0.2935	0.2886	0.2091	0.2147
														H	0.0622	0.0615	0.3298	0.3172	0.392	0.3599	0.3401	0.3202	0.2331	0.2481
SECOND RUN
WELL FORMAT
	1	2	3	4	5	6	7	8	9	10	11	12
A	3.000 Std	3.000 Std	SAM 1 - PRE2	SAM 1 - PRE2	SAM 3 - PRE2	SAM 3 - PRE2	SAM 5 - PRE2	SAM 5 - PRE2	SAM 7 - PRE2	SAM 7 - PRE2	SAM 9 - PRE2	SAM 9 - PRE2
B	1.000 Std	1.000 Std	SAM 1 - POST10	SAM 1 - POST10	SAM 3 - POST10	SAM 3 - POST10	SAM 5 - POST10	SAM 5 - POST10	SAM 7 - POST10	SAM 7 - POST10	SAM 9 - POST10	SAM 9 - POST10
C	0.333 Std	0.333 Std	SAM 1 - POST20	SAM 1 - POST20	SAM 3 - POST20	SAM 3 - POST20	SAM 5 - POST20	SAM 5 - POST20	SAM 7 - POST20	SAM 7 - POST20	SAM 9 - POST20	SAM 9 - POST20
D	0.111 Std	0.111 Std	SAM 1 - POST30	SAM 1 - POST30	SAM 3 - POST30	SAM 3 - POST30	SAM 5 - POST30	SAM 5 - POST30	SAM 7 - POST30	SAM 7 - POST30	SAM 9 - POST30	SAM 9 - POST30
E	0.037 Std	0.037 Std	SAM 2 - PRE2	SAM 2 - PRE2	SAM 4 - PRE2	SAM 4 - PRE2	SAM 6 - PRE2	SAM 6 - PRE2	SAM 8 - PRE2	SAM 8 - PRE2	SAM 10 - PRE2	SAM 10 - PRE2
F	0.012 Std	0.012 Std	SAM 2 - POST10	SAM 2 - POST10	SAM 4 - POST10	SAM 4 - POST10	SAM 6 - POST10	SAM 6 - POST10	SAM 8 - POST10	SAM 8 - POST10	SAM 10 - POST10	SAM 10 - POST10
G	Zero	Zero	SAM 2 - POST20	SAM 2 - POST20	SAM 4 - POST20	SAM 4 - POST20	SAM 6 - POST20	SAM 6 - POST20	SAM 8 - POST20	SAM 8 - POST20	SAM 10 - POST20	SAM 10 - POST20
H	Ctrl - H	Ctrl - L	SAM 2 - POST30	SAM 2 - POST30	SAM 4 - POST30	SAM 4 - POST30	SAM 6 - POST30	SAM 6- POST30	SAM 8 - POST30	SAM 8 - POST30	SAM 10 - POST30	SAM 10 - POST30
READ @450nm														READ @491nm
	1	2	3	4	5	6	7	8	9	10	11	12			1	2	3	4	5	6	7	8	9	10	11	12
A	0.1892	0.1872	1.3307	1.2696	0.9978	0.9876	1.6136	1.5483	1.1015	1.0348	1.2752	1.215		A	0.067	0.0665	0.2594	0.251	0.2056	0.2032	0.3075	0.2971	0.2201	0.2106	0.2445	0.2408
B	0.4168	0.3933	0.7772	0.7817	0.5954	0.5785	1.2553	1.2058	0.8457	0.7957	0.8874	0.8833		B	0.1035	0.1026	0.1689	0.1709	0.1399	0.1357	0.2468	0.2353	0.1789	0.1713	0.1864	0.1843
C	0.8482	0.7785	0.4982	0.4624	0.6366	0.626	1.5399	1.503	1.1143	1.1378	0.8058	0.7901		C	0.1758	0.1672	0.1214	0.1147	0.1445	0.1423	0.2945	0.2898	0.2244	0.2293	0.173	0.1689
D	1.3796	1.2642	0.392	0.3635	0.6858	0.6898	1.4273	1.3714	1.1208	1.0913	0.8297	0.8262		D	0.27	0.2501	0.103	0.0982	0.1536	0.1538	0.2784	0.2686	0.2262	0.2209	0.1815	0.1759
E	1.7674	1.7399	1.2412	1.1474	1.361	1.2981	0.9121	0.8679	1.2571	1.1934	1.2007	1.1392		E	0.3342	0.3268	0.2454	0.2295	0.2662	0.2557	0.191	0.1828	0.2474	0.2381	0.2394	0.2285
F	1.9279	1.9076	1.1294	1.0742	0.638	0.5857	0.9921	0.9296	0.5501	0.5203	0.6862	0.6985		F	0.3605	0.3589	0.2281	0.2191	0.1462	0.1367	0.2056	0.1947	0.1305	0.1252	0.1537	0.1569
G	1.9053	1.873	1.3925	1.3246	0.5015	0.464	1.1287	1.0422	0.7838	0.7197	0.6109	0.5937		G	0.3559	0.3506	0.2722	0.26	0.1207	0.1146	0.2284	0.2116	0.1688	0.158	0.1396	0.1376
H	0.423	1.5409	1.3087	1.2926	0.5286	0.5087	0.9575	0.9649	0.7593	0.7717	0.7712	0.7415		H	0.1088	0.2966	0.2575	0.2559	0.1291	0.124	0.1988	0.2003	0.1679	0.1686	0.165	0.1577
THIRD RUN
WELL FORMAT
	1	2	3	4
A			PAR3 - X	PAR3 - X
B			PAR5 - X	PAR5 - X
C			PAR7 - X	PAR7 - X
D			PAR8 - X	PAR8 - X
E			PAR14 - X	PAR14 - X
F			PAR15 - X	PAR15 - X
G			PAR16 - X	PAR16 - X
H	PAR19 - X	PAR19 - X	PAR17 - X	PAR17 - X
READ @450nm						READ @491nm
	1	2	3	4			1	2	3	4
A			1.2506	1.3407		A			0.2506	0.2665
B			1.4264	1.3638		B			0.2793	0.2666
C			1.288	1.1761		C			0.2555	0.236
D			1.6573	1.568		D			0.3162	0.3055
E			1.3537	1.4508		E			0.2639	0.2813
F			1.093	1.1075		F			0.2224	0.2237
G			1.6061	1.5269		G			0.3073	0.2952
H	1.1816	1.0849	1.4104	1.3968		H	0.1088	0.2966	0.2575	0.2559

## Sheet: ELISA - Glutamate
FIRST RUN
WELL FORMAT
	1	2	3	4	5	6	7	8	9	10	11	12
A	S6 - 10	S6 - 10	SAM 1 - PRE	SAM 1 - PRE	SAM 3 - PRE	SAM 3 - PRE	SAM 5 - PRE	SAM 5 - PRE	SAM 7 - PRE	SAM 7 - PRE	SAM 9 - PRE	SAM 9 - PRE
B	S5 - 8	S5 - 8	SAM 1 - X	SAM 1 - X	SAM 3 - X	SAM 3 - X	SAM 5 - X	SAM 5 - X	SAM 7 - X	SAM 7 - X	SAM 9 - X	SAM 9 - X
C	S4 - 6	S4 - 6	SAM 1 - POST20	SAM 1 - POST20	SAM 3 - POST20	SAM 3 - POST20	SAM 5 - POST20	SAM 5 - POST20	SAM 7 - POST20	SAM 7 - POST20	SAM 9 - POST20	SAM 9 - POST20
D	S3 - 4	S3 - 4	SAM 1 - POST60	SAM 1 - POST60	SAM 3 - POST60	SAM 3 - POST60	SAM 5 - POST60	SAM 5 - POST60	SAM 7 - POST60	SAM 7 - POST60	SAM 9 - POST60	SAM 9 - POST60
E	S2 - 2	S2 - 2	SAM 2 - PRE	SAM 2 - PRE	SAM 4 - PRE	SAM 4 - PRE	SAM 6 - PRE	SAM 6 - PRE	SAM 8 - PRE	SAM 8 - PRE	SAM 10 - PRE	SAM 10 - PRE
F			SAM 2 - X	SAM 2 - X	SAM 4 - X	SAM 4 - X	SAM 6 - X	SAM 6 - X	SAM 8 - X	SAM 8 - X	SAM 10 - X	SAM 10 - X
G	S1 - 0	S1 - 0	SAM 2 - POST20	SAM 2 - POST20	SAM 4 - POST20	SAM 4 - POST20	SAM 6 - POST20	SAM 6 - POST20	SAM 8 - POST20	SAM 8 - POST20	SAM 10 - POST20	SAM 10 - POST20
H			SAM 2 - POST60	SAM 2 - POST60	SAM 4 - POST60	SAM 4 - POST60	SAM 6 - POST60	SAM 6- POST60	SAM 8 - POST60	SAM 8 - POST60	SAM 10 - POST60	SAM 10 - POST60
	1	2	3	4	5	6	7	8	9	10	11	12
A	0.8116	0.8754	0.4475	0.1977	0.7155	0.7909	0.9799	1.0091	0.1654	0.2273	0.3062	0.3158
B	0.74	0.854	0.59	0.6563	0.6615	0.6052	0.5559	0.589	0.1667	0.1212	0.2361	0.2793
C	0.7472	0.6707	0.2946	0.4265	0.2615	0.2764	0.5207	0.4806	0.289	0.1564	0.1705	0.1578
D	0.4757	0.6749	0.1342	0.1342	0.3083	0.3615	0.2608	0.2656	0.1426	0.1547	0.1689	0.2494
E	0.2529	0.2338	0.7172	0.7053	0.2503	0.2456	0.208	0.5205	0.2419	0.1872	0.5365	0.4954
F	2.0843	1.938	0.2561	0.255	0.4221	0.4157	0.23	0.2727	0.1014	0.0933	0.7453	0.5715
G	0.0944	0.0787	0.215	0.2083	0.24	0.2242	0.2757	0.2556	0.0937	0.3571	0.486	0.5013
H	0.0765	0.1209	0.3957	0.2185	0.2174	0.2072	0.1878	0.2301	0.0883	0.1911	0.3411	0.3407
SECOND RUN
WELL FORMAT
	1	2	3	4	5	6	7	8	9	10	11	12
A	S6 - 10	S6 - 10	SAM 1 - PRE2	SAM 1 - PRE2	SAM 3 - PRE2	SAM 3 - PRE2	SAM 5 - PRE2	SAM 5 - PRE2	SAM 7 - PRE2	SAM 7 - PRE2	SAM 9 - PRE2	SAM 9 - PRE2
B	S5 - 8	S5 - 8	SAM 1 - POST10	SAM 1 - POST10	SAM 3 - POST10	SAM 3 - POST10	SAM 5 - POST10	SAM 5 - POST10	SAM 7 - POST10	SAM 7 - POST10	SAM 9 - POST10	SAM 9 - POST10
C	S4 - 6	S4 - 6	SAM 1 - POST30	SAM 1 - POST30	SAM 3 - POST30	SAM 3 - POST30	SAM 5 - POST30	SAM 5 - POST30	SAM 7 - POST30	SAM 7 - POST30	SAM 9 - POST30	SAM 9 - POST30
D	S3 - 4	S3 - 4	SAM 1 - POST50	SAM 1 - POST50	SAM 3 - POST50	SAM 3 - POST50	SAM 5 - POST50	SAM 5 - POST50	SAM 7 - POST50	SAM 7 - POST50	SAM 9 - POST50	SAM 9 - POST50
E	S2 - 2	S2 - 2	SAM 2 - PRE2	SAM 2 - PRE2	SAM 4 - PRE2	SAM 4 - PRE2	SAM 6 - PRE2	SAM 6 - PRE2	SAM 8 - PRE2	SAM 8 - PRE2	SAM 10 - PRE2	SAM 10 - PRE2
F	S1 - 0	S1 - 0	SAM 2 - POST10	SAM 2 - POST10	SAM 4 - POST10	SAM 4 - POST10	SAM 6 - POST10	SAM 6 - POST10	SAM 8 - POST10	SAM 8 - POST10	SAM 10 - POST10	SAM 10 - POST10
G			SAM 2 - POST30	SAM 2 - POST30	SAM 4 - POST30	SAM 4 - POST30	SAM 6- POST30	SAM 6- POST30	SAM 8 - POST30	SAM 8 - POST30	SAM 10 - POST30	SAM 10 - POST30
H			SAM 2 - POST50	SAM 2 - POST50	SAM 4 - POST50	SAM 4 - POST50	SAM 6 - POST50	SAM 6- POST50	SAM 8 - POST50	SAM 8 - POST50	SAM 10 - POST50	SAM 10 - POST50
READ @ 450nm
	1	2	3	4	5	6	7	8	9	10	11	12
A	0.8064	0.7002	0.5007	0.4795	0.4357	0.466	1.0778	1.1234	0.156	0.1652	0.3028	0.2502
B	0.7022	0.6206	0.2582	0.3358	0.2997	0.3032	0.261	0.2684	0.1474	0.1955	0.2141	0.2007
C	0.4668	0.498	0.3015	0.2394	0.2486	0.2524	0.331	0.3685	0.137	0.1382	0.2008	0.2178
D	0.3271	0.3799	0.1631	0.1706	0.2174	0.4689	0.1962	0.2132	0.4111	0.5112	0.1525	0.1665
E	0.2075	0.2187	0.2862	0.3204	0.331	0.3655	0.2025	0.4791	0.2137	0.1084	0.513	0.594
F	0.0847	0.0838	0.2665	0.2675	0.2414	0.2581	0.1825	0.1866	0.1062	0.1613	0.9701	0.709
G			0.2498	0.2538	0.2534	0.2562	0.1685	0.1803	0.1015	0.1566	0.3642	0.386
H			0.2799	0.2902	0.2253	0.2179	0.1306	0.1351	0.0959	0.0945	0.3104	0.319
